# Supplementary material for: Pitfalls in the genetic testing of the OPN1LW-OPN1MW gene cluster in human subjects
Source: PubMed Central journal article supplement (PMC11069579; doi:10.1038/s41525-024-00406-y), 2024-05-04
Supplement: 41525_2024_406_MOESM1_ESM.pdf [file 41525_2024_406_MOESM1_ESM.pdf]

# Pitfalls in the genetic testing of the *OPN1LW-OPN1MW* gene cluster in human subjects

## Supplementary Methods

### *Subjects, biosamples and standard DNA isolation*

The study was performed in compliance with the tenets of the WMA Declaration of Helsinki. The study was approved by the Ethics Committee of the Medical Faculty, Eberhard-Karls University Tübingen and consent for research was obtained from participants. Genomic DNA was isolated from venous blood samples according to standard salt-out & precipitation or column –based procedures if not stated otherwise.

### *Copy Number qPCR*

qPCRs were done to determine the copy number of the 697 bp SDIns polymorphisms relative to *OPN1LW* and *OPN1MW* copy number and an autosomal single copy control sequence (*SDC4* locus on chromosome 20). qPCR assay primers are listed in Supplementary Table 1. qPCRs reactions (15 µl volume, 30 ng template DNA) were done in triplicates with all four assays in parallel on the same instrument run on an ABI 7500 qPCR instrument using Quantitect SYBR Green PCR Kit (Qiagen, Hilden Germany).  $\Delta$ Ct values (*SDC4* control – test assay) from a series of subjects with defined *OPN1LW-OPN1MW* gene copies (as determined by Southern blot detection of fragment size of pulsed-field gel electrophoretic separation of *NotI*-digested genomic DNA and Fiber-FISH (Wolf et al. 1999)) and selected subjects with partial deletions of the *OPN1LW-OPN1MW* gene cluster served as calibrators for *OPN1LW-OPN1MW* gene copy number and SDIns single copy, respectively.

### *Multiplex Ligation-Dependent Probe Amplification (MLPA)*

For MLPA we used a pre-marketing release version of the SALSA X080-B1 Opsin probe-mix (MRC Holland, Amsterdam, The Netherlands) targeting sequences of the LCR, and individual exons of *OPN1LW* and *OPN1MW* specifically. MLPA was performed according to the manufacturer's recommendations and amplification products were separated by capillary electrophoresis on an ABI 3130 instrument. Data analysis was done using the Coffalyser.Net software (MRC Holland) which calculates ratios in comparison to reference samples co-processed with the test samples.

### *Long distance PCR amplification and restriction enzyme digestion*

Long distance PCR amplifications were done in 25 or 50 µl volumes using the NEB LongAmp HotStart Taq 2 x Master Mix (New England Biolabs, Frankfurt/Main, Germany) with 2-3 ng/µl template DNA and 400 nM of forward and reverse primers. By default, we used the following standard LD PCR cycling protocol for amplification: 1 min 94°C, 30 x [30 sec 94°C, 14-16 min 65°C], 10 min 65°C. 5-15 µl of LD PCR products were used for restriction enzyme digestion with *Bam*HI (LD-LW) or *Sal*I (LD-Ds) in a volume of 20 µl with 20 U of enzyme for 2 h at 37°C. The digested LD PCR fragments were separated on 0.8%

agarose gels.

### *Sanger Sequencing*

LD PCR products were diluted 1:200 to 1:1000 and subjected to nested amplification with primers for exon 3, exon 4 and exon 5 of the *OPN1LW/OPN1MW* gene (non-discriminant). 0.5 – 1 µl of the nested PCR products were used for cycle sequencing with 1 µl of SupreDye v1.1 Cycle Sequencing chemistry (BioCat, Heidelberg, Germany) for 25 cycles at 55°C. Isopropanol-precipitated sequencing products were separated on an ABI 3130 capillary sequencer (ThermoFischer/Applied Biosystems, Darmstadt, Germany).

### *ONT Cas9-based targeted long-read sequencing*

High molecular weight (HMW) DNA was isolated from fresh blood using the NEB HMW DNA Extraction Kit (New England Biolabs) and its quality tested by pulsed-field electrophoresis on a CHEFII instrument (Bio-Rad, Munich, Germany). For targeted sequencing of the *OPN1LW-OPN1MW* locus we applied the Oxford Nanopore Cas9-targeted sequencing (nCATS) strategy (Gilpatrick et al. 2020) using the SQK-CS9109 Cas9 Sequencing Kit (Oxford Nanopore Technologies, Oxford, United Kingdom). In brief, 5 µg of HMW DNA (w/o or with prior *NotI* digestion to reduce viscosity) were dephosphorylated for 10 min at 37°C followed by inactivation of the phosphatase for 2 min at 80°C. Dephosphorylated DNA was divided into two portions with each portion subjected to cleavage with 0.125 µM Cas9 ribonucleotide complexes prepared from recombinant Cas9 (Alt-R-Cas9, Integrated DNA Technologies [IDT], Leuven Belgium), tracrRNA (IDT) and either pool 1 (BL-715 5'-AAGGACCUACAGCUCAUGGGGUUUUAGAGCUAUGCU-3' and CHOP\_267 5'-CUGAAAUGCCCAUGUCCGGGUUUUAGAGCUAUGCU-3') or pool 2 (IDT\_855 5'-CGCAAGCAAGUCAAGGGAUCGUUUUAGAGCUAUGCU-3' and CSPO\_586 5'-UCUGGACACUCUGUCGACGGGUUUUAGAGCUAUGCU-3') of crRNAs. *In vitro* cleavage was done for 60 min at 37°C, followed by 3' A-addition with Taq Polymerase for 5 min at 72°C and subsequent adaptor ligation for 10 min at room temperature. Samples were purified using AmpPure beads (0.3x) and washed once with LF buffer and once with SF buffer (Oxford Nanopore Technologies). The purified library was eluted in 18 µl elution buffer for 16 h at room temperature.

Two libraries were prepared and the complete eluted Cas9-enriched library was loaded each on a single MinION flow cell FLO-MIN106D R9.4.1 and run for 72 hours. Basecalling of the raw data used Guppy v.6.3.9 with the dna\_r9.4.1\_promethion\_384 (HAC) model. In a primary alignment step, all reads were mapped to the complete GRCh38 reference genome using minimap2 (Li 2018). We then used the four specific sequences for the Cas9-based excision to define a target region, with coordinates chrX:154,143,640-154,295,680 (hg38). The alignment of reads mapping inside this target region was refined using a prefix alignment approach with edlib (Šošić & Šikic 2017) called from a custom python script.

## Supplementary References

Gilpatrick, T., Lee, I., Graham, J.E., Raimondeau, E., Bowen, R., Heron, A., Downs, B., Sukumar, S., Sedlazeck, F.J. & Timp, W. Targeted nanopore sequencing with Cas9-guided adapter ligation. *Nat. Biotechnol.* **38**, 433-438 (2020.)

Li, H. Minimap2: pairwise alignment for nucleotide sequences. *Bioinformatics* **34**, 3094-3100 (2018).

Šošić, M. & Šikić, M. Edlib: a C/C++ library for fast, exact sequence alignment using edit distance. *Bioinformatics* **33**, 1394-1395 (2017).

Wolf, S., Sharpe, L.T., Schmidt, H.J., Knau, H., Weitz, S., Kioschis, P., Poustka, A., Zrenner, E., Lichter, P. & Wissinger, B. Direct visual resolution of gene copy number in the human photopigment gene array. *Invest. Ophthalmol. Vis. Sci.* **40**, 1585-1589 (1999).

```

154,239,648      GGATCACGAGGTCAGGAGATCGAGACCATCCTGGCCAACACGGTGAAACC
                  |||
154,165,373      GGATCACGAGGTCAGGAGATCGAGACCATCCTGGCCAACACGGTGAAACC

154,239,698      CCGTCTCTACTAAAAATACAAAAATTAGCCGGGCGTGGTGGTGC GCGCCT
                  |||
154,165,423      CCGTCTCTACTAAAA-----

154,239,748      GTAGTCCCAGCTACTCGGGAGGCTGAGGCAGGAGAATGGCGTGAACCCGG
154,165,437      -----

154,239,798      GAGGCGGAGCTTGCAGTGAGCCGAGATCACGCCACTGCACTCCAGCCTGG
154,165,437      -----

154,239,848      GTGACAGAACGAGACTCCGTCTCAAAAAAAAAAAAAAAAAAATTGTTCCAAAA
154,165,437      -----

154,239,898      CATTTTCATCACTGCCTCGAAAAATACTATTTAGCAGTCACTCCCCATT
154,165,437      -----

154,239,948      CCCCATCACCCAGTCCCTGGTAACCACCAATCTGCTTTCTGACTTGAGT
154,165,437      -----

154,239,998      AGCTTCTTATCTCTGAACCTCTACCAGCAATTTATGAATGAGAGATGGAC
154,165,437      -----

154,240,048      AAGACCATCAGGTATGTGGAGACGGTCCTAGAGAAGCTGCTAGAAAAGTGA
154,165,437      -----

154,240,098      CAGACAACCAGAGTAAGGGGTAGTGGAGCACTGTAATGCTGTGGAGAGGA
154,165,437      -----

154,240,148      GAGGGCAGCAGGAATGACAAACCAGGAGGCATTGACTCAGGGAAAGAAG
154,165,437      -----

154,240,198      AGGAAGGCAGGGTCAGGTCGAGATCTTGGCCAAATCCCTGAGCTCATCAA
154,165,437      -----

154,240,248      CCTAGGGTGTCTCCATTGATGAATTTATCAAGAGTCATTGGCCGGGAGTGG
154,165,437      -----

154,240,298      TGGCTCACGCCTGTAATCACAGCACTTTGGGAGGCCAAGGCAGGTGGATC
154,165,437      -----

154,240,348      ATTTGAGATTAGGAGTTGGAGACCAGCCTGGCCAACATGATGAAACCCCG
154,165,437      -----

154,240,398      TCTCTACTAAAAATATGCAAAAATTAGCTGGGCGTGGTGGTGCATGCCTGT
                  |||
154,165,437      -----TATGCAAAAATTAGCTGGGCGTGGTGGTGCATGCCTGT

154,240,448      AATCTCAGCT
                  |||
154,165,476      AATCTCAGCT

```

**Supplementary Figure 1:** Sequence of the 697 bp SDIns polymorphism (highlighted in yellow) and alignment of the flanking sequence with an SD copy (SD1) sequence lacking the insertion. Coordinates based on the GRCH/hg38 assembly.

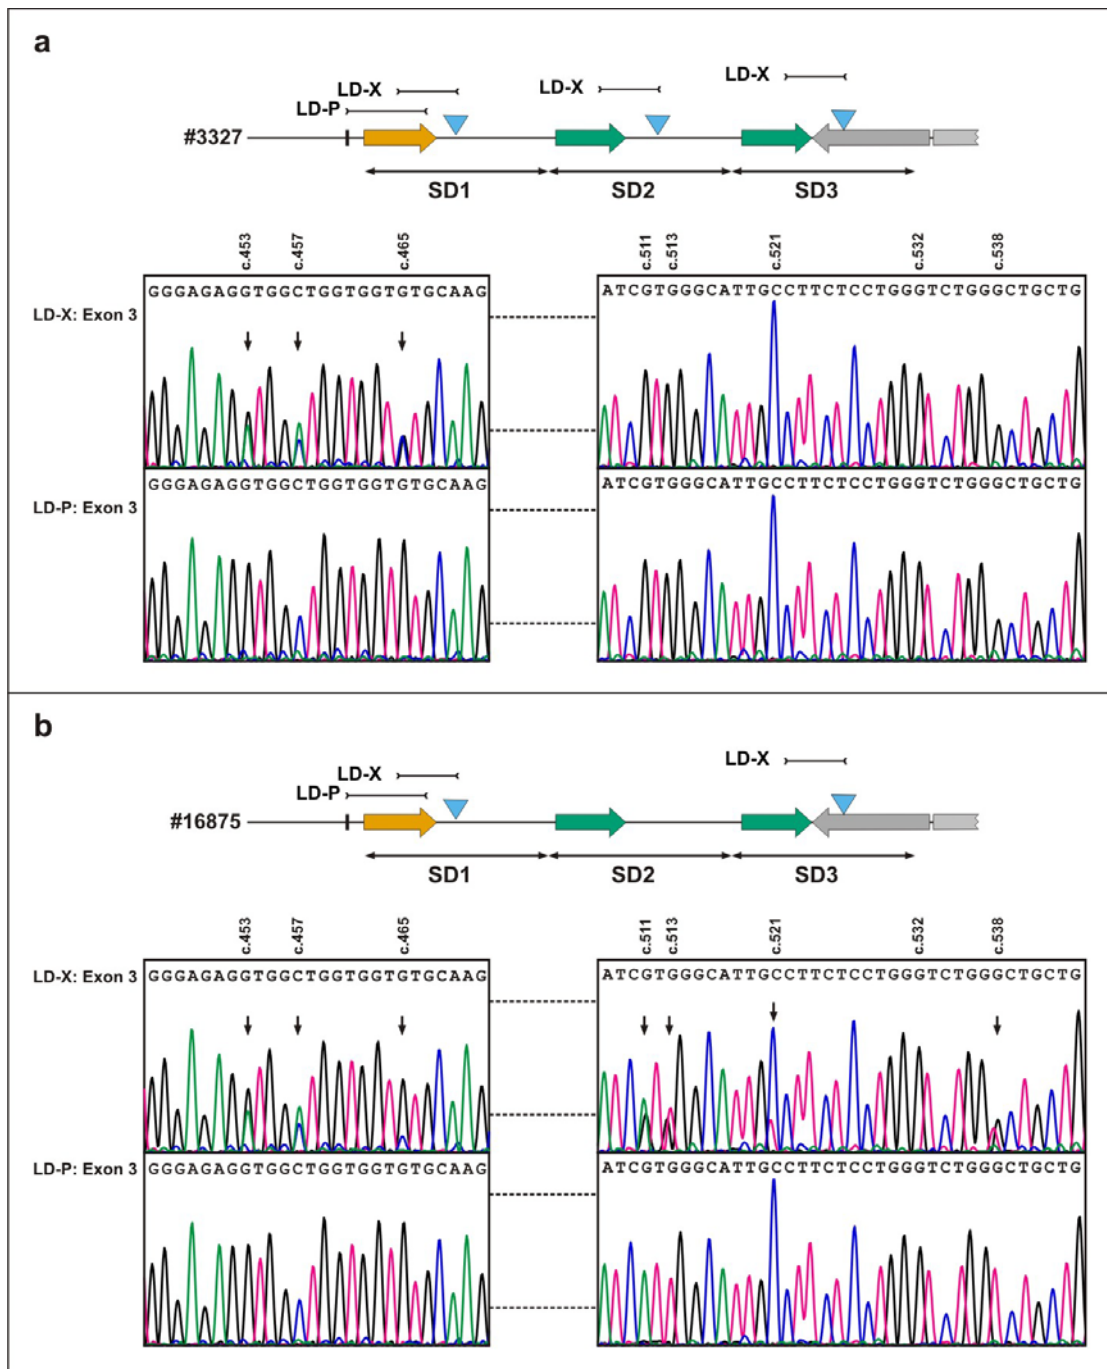

**Supplementary Figure 2:** Ambiguous exon 3 sequences based on the design of LD PCR amplicons. Exon 3 sequences for proband #3327 (A) and proband #16875 (B), both with a clinical diagnosis of cone dysfunction potentially linked to exon 3 haplotype associated splicing defects. Exon 3 sequences were obtained for the LD PCR amplicon LD-X (as proposed by Haer-Wigman and co-workers) in comparison with those obtained for LD PCR amplicons LD-P (specific for the most proximal gene copy). Top: Deduced structure of the *OPN1LW-OPN1MW* gene array. SD1, SD2, and SD3 indicate the number and extent of individual segmental duplications forming the opsin gene cluster. The blue triangles indicate the presence and localization of the 697 bp SDIns insertion. Bottom: Sanger sequence traces for two segments of exon 3 as obtained from the different LD PCR amplicons. The eight common variant sites in exon 3 which jointly form haplotypes, some of which induce splicing defects, are indicated above the chromatograms. Arrows indicate overlaid sites in the sequence obtained from the LD-X amplicon.

**Supplementary Table 1: Oligonucleotide Primer Sequences**

| Name         | Orientation | Sequence (5'-3')                | Amplicon / Application                     |
|--------------|-------------|---------------------------------|--------------------------------------------|
| LCR1F        | Forward     | CACCCTTCTGCAAGAGTGTGGG          | LD-PCR (LD-P)                              |
| RGCP2-5R     | Reverse     | GCGGACTAGTGATCTGCTGATGGTGTGCTTA | LD-PCR (LD-P)                              |
| FEO 27       | Forward     | ACAAACCCCAACCGAGTTAG            | LD PCR (LD-D)                              |
| RGCP_FODA    | Forward     | TGCAACAAAGCCCTAAGCAGAT          | LD PCR (LD-Ds, LD-SDIns)                   |
| RGCP_ODA-R   | Reverse     | GCTCGCCCTGTGTCTGAAATG           | LD PCR (LD-D, LD-Ds)                       |
| OPN1-IG2R    | Reverse     | GTGACTGCCCAAAGACATGTTG          | LD PCR (LD-LW, LD-SDIns)                   |
| RCP-4F       | Forward     | CATCCCACTCGCTATCATCA            | LD PCR (LD-LW)                             |
| 79R-F        | Forward     | GATCTTTGCGTACTGCGTCTGCTGG       | LD PCR (LD-LW)                             |
| HW099-820    | Forward     | AGGTGTAGAGCCCTAGCAAAC           | LD PCR (LD-X), Haer-Wigman et al. 2022     |
| HW099-821X   | Reverse     | TCTCTATTTCATAAATTGCTGGTA        | LD PCR (LD-X), Haer-Wigman et al. 2022     |
| FEO 201      | Forward     | TCCAACCCCGACTCACTATC            | Exon 5 nested PCR                          |
| FEO 202      | Reverse     | ACGGTATTTTGTATGTGGATCTGCT       | Exon 5 nested PCR                          |
| Ex 4F/FEO 27 | Forward     | ACAAACCCCAACCGAGTTAG            | Exon 4 nested PCR & Sequencing             |
| Ex 4R/FEO 26 | Reverse     | AGGAGTCTCAGTGGACTCAT            | Exon 4 nested PCR & Sequencing             |
| Ex 3F        | Forward     | TGGTGAAAGAAAGATGTCG             | Exon 3 nested PCR & Sequencing             |
| Ex 3R        | Reverse     | GCCCAGAGAAAGGAAGTGATT           | Exon 3 nested PCR & Sequencing             |
| Ex 5 Seq-F   | Forward     | AATCCACCCAGAAGGCAGA             | Exon 5 Sequencing                          |
| Ex 5 Seq-R   | Reverse     | GGGTTGTAGATAGTGGCAC             | Exon 5 Sequencing                          |
| OPN1-23_QF   | Forward     | AGACAACCCAGAACAGTAGG            | qPCR (123 bp), OPN1LW & OPN1MW copy number |
| OPN1-23_QR   | Reverse     | AGGATCTGGGAATTGTGTCTCC          | qPCR (123 bp), OPN1LW & OPN1MW copy number |
| OPN1-45_QF   | Forward     | GTGATTCCTTTGGGACTGTACC          | qPCR (118 bp), OPN1LW & OPN1MW copy number |
| OPN1-45_QR   | Reverse     | TGTCCCTTAGTGGACTCCTC            | qPCR (118 bp), OPN1LW & OPN1MW copy number |
| OPN1ins-QF   | Forward     | GCTGCTAGAAAGTGACAGACAAC         | qPCR (97 bp), SDIns copy number            |
| OPN1ins-QR   | Reverse     | TGCCTCTGGGTTTGTCTTC             | qPCR (97 bp), SDIns copy number            |
| SDC4_F       | Forward     | CAGGGTCTGGGAGCCAAGT             | qPCR, autosomal copy number control        |
| SDC4_R       | Reverse     | GCACAGTGCTGGACATTGACA           | qPCR, autosomal copy number control        |

**Supplementary Table 2:** List of reagents and Suppliers

| Reagent / Kit                                                 | Supplier                                             | Catalog-No.        |
|---------------------------------------------------------------|------------------------------------------------------|--------------------|
| Quantitect SYBR Green PCR Kit                                 | Qiagen                                               | 204143             |
| X80-B1 Probe Mix                                              | MRC-Holland                                          | Pre-marketing      |
| SALSA MLPA EK1 Reagent Kit                                    | MRC Holland                                          | EK1-FAM-I          |
| MLPA Control Sample                                           | MRC Holland                                          | SD083-S01          |
| NEB LongAmp HotStart Taq 2 x Master Mix                       | New England Biolab                                   | M0533L             |
| Roche Expand Long Range dNTPack                               | Merck                                                | 4829034001         |
| Restriction Endonuclease, <i>Bam</i> HI                       | New England Biolab                                   | R0136              |
| Restriction Endonuclease, <i>Not</i> I                        | New England Biolab                                   | R0189              |
| Restriction Endonuclease, <i>Sal</i> I                        | New England Biolab                                   | R0138              |
| $\lambda$ -DNA/ <i>Hind</i> III cleaved (size standard)       | ThermoFisher/Fermentas                               | SM0103             |
| $\lambda$ -DNA/ <i>Hind</i> III+EcoRI cleaved (size standard) | ThermoFisher/Fermentas                               | SM0191             |
| GeneRuler 1 kb DNA Ladder (size standard)                     | ThermoFisher/Fermentas                               | SM0311             |
| Qiagen Multiplex PCR Kit (100)                                | Qiagen                                               | 206143             |
| Taq Polymerase                                                | GenAxxon                                             | M3001.X            |
| SupreDye v1.1 Cycle Sequencing Kit                            | BioCat                                               | 060008-ADS         |
| Illustra ExoPro Star 1-Step                                   | Cytiva                                               | US77720            |
| NEB HMW DNA Extraction Kit                                    | New England Biolabs                                  | T3060S/L           |
| Alt-R-S.p. Cas9 nuclease V3                                   | Integrated DNA Technologies                          | 1081058            |
| tracRNA                                                       | Integrated DNA Technologies                          | 1072533            |
| crRNA synthesis                                               | Integrated DNA Technologies                          | custom             |
| Cas9 Sequencing Kit                                           | Oxford Nanopore Technologies                         | SQK-CS9109         |
| AMPure beads                                                  | Beckman-Coulter                                      | B23317             |
| Minlon Flow Cell                                              | Oxford Nanopore Technologies                         | FLO-MIN106D R9.4.1 |
| Oligonucleotides                                              | Merck/Genosys, Integrated DNA Technologies, Eurofins | custom             |
